# Supplementary material
Source: publisher figshare collection journal article supplement (https://gsapubs.figshare.com/ndownloader/files/22760018)

Appendix 1: Vorticity analysis data based on lawsonite shape fabrics; samples are located on Fig. 1. Vertical dashed lines are chosen critical aspect ratios  $R_c$  that are used to determine  $W_m$ . The choice of the critical aspect ratio  $R_c$  was made after consideration of two criteria: the overall shape of the envelope of data points and the angle between lawsonite long axes and the glaucophane (omphacite in sample SV08-176B) foliation. In samples SV08-17A and 274A, the envelope shows an abrupt slope at low aspect ratios, defining a clear cut-off value. In samples SV01-49A and SV08-5D, there is also a steep slope of the envelope, but the cut-off value is not so clear and is likely comprised between two possible values. In all pods and fault zone slivers samples, the envelope shows a smooth curvature over a broad range of aspect ratios. In this case,  $R_c$  was evaluated on the basis of the angular value: where two  $R_c$  are shown, the right-hand  $R_c$  shows the cut-off value where the total amplitude of angle to foliation is  $< 30^\circ$ ; the left-hand  $R_c$  is a more conservative value of  $R_c$  where the  $> 30^\circ$  total amplitude of angle to foliation is controlled by relatively few data points or where the envelope of data points shows a steep slope.

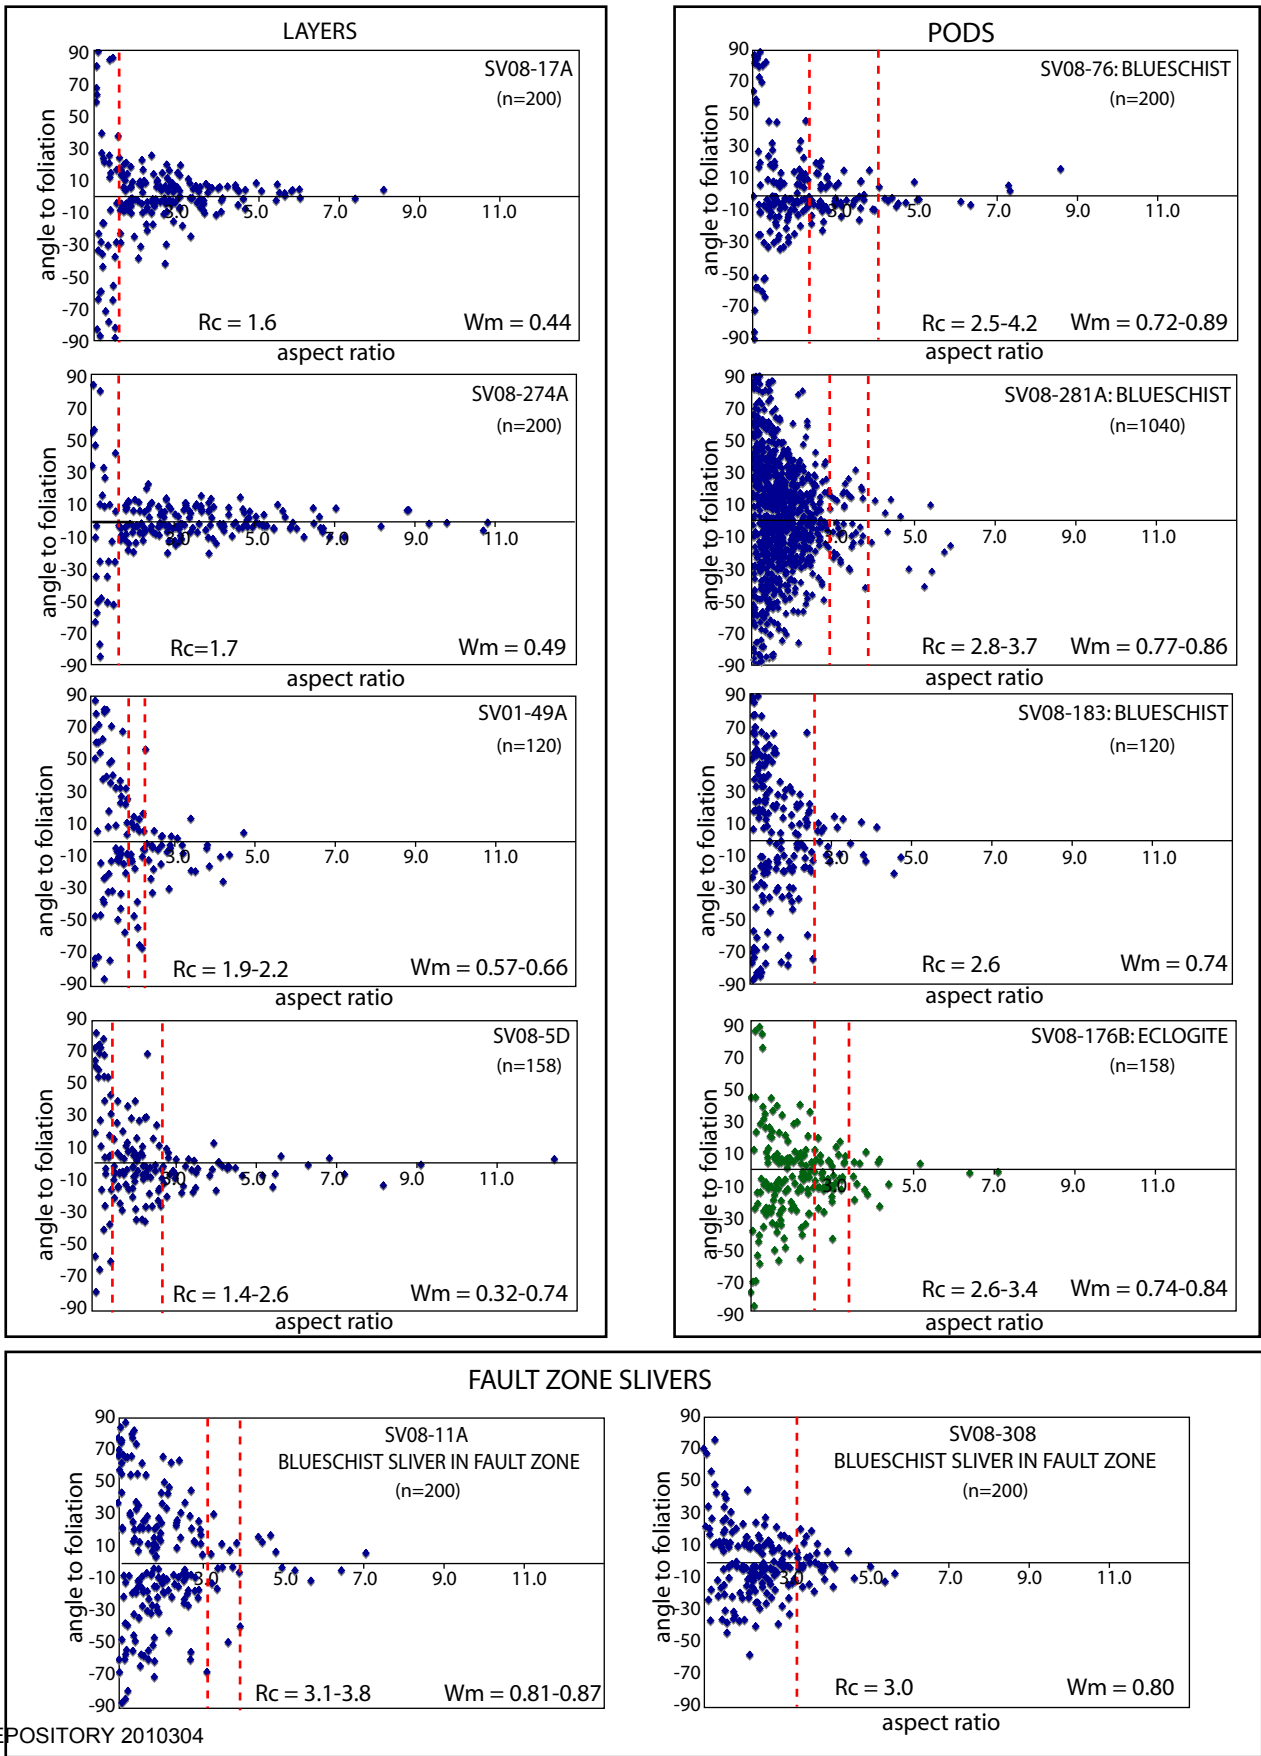

Supplement: Supplementary file 1 [file 22760018]
